27 Prof. Guotian Li  
28 State Key Laboratory of Agricultural Microbiolog and College of Plant  
29 Science and Technology, Huazhong Agricultural University, Wuhan  
30 430070, Hubei, China  
31 E-mail: li4@mail.hzau.edu.cn

32  
33

## 34 **Abstract**

35 Here, we report the *de novo* genome sequencing and analysis of *Oryza sativa* ssp. *japonica* variety  
36 KitaakeX, a Kitaake plant carrying the rice XA21 immune receptor. Our KitaakeX sequence assembly  
37 contains 377.6 Mb, consisting of 33 scaffolds (476 contigs) with a contig N50 of 1.4 Mb. Complementing  
38 the assembly are detailed gene annotations of 35,594 protein coding genes. We identified 331,335 genomic  
39 variations between KitaakeX and Nipponbare (ssp. *japonica*), and 2,785,991 variations between KitaakeX  
40 and Zhenshan97 (ssp. *indica*). We also compared Kitaake resequencing reads to the KitaakeX assembly  
41 and identified 219 small variations. The high-quality genome of the model rice plant KitaakeX will accelerate  
42 rice functional genomics.

43 **Keywords:** Rice, Kitaake, KitaakeX, XA21 immune receptor, Whole genome sequence, *De novo* genome  
44 assembly, Nipponbare, Zhenshan97

## 45 **Background**

46 Rice (*Oryza sativa*) provides food for more than half of the world's population [1] and also serves  
47 as a model for studies of other monocotyledonous species. Cultivated rice contains two major types of *O.*  
48 *sativa*, the *O. sativa indica/Xian* group and the *O. sativa japonica/Geng* group. Using genomic markers, two  
49 additional minor types have been recognized, the circum-Aus group and the circum-Basmati group [2].

50           The Kitaake cultivar (*ssp. japonica*), which originated at the northern limit of rice cultivation in  
51 Hokkaido, Japan [3], has emerged as a model for rice research [4] because it is extremely early flowering,  
52 easy to propagate, and short in stature [5]. Kitaake has been used to establish multiple mutant  
53 populations, including an RNAi mutant collection [6], T-DNA insertion collections [4], [7], and a whole-  
54 genome sequenced mutant population of KitaakeX, a Kitaake variety carrying the *Xa21* immune receptor  
55 gene (formerly called X.Kitaake) [8, 9]. Kitaake has been used to explore diverse aspects of rice biology,  
56 including flowering time [10], disease resistance [11], [12], [13], small RNA biology [14], and the CRISPR-  
57 Cas9 and TALEN technologies [15], [16].

58           The unavailability of the Kitaake genome sequence has posed an obstacle to the use of Kitaake  
59 in rice research. For example, analysis of a fast-neutron (FN) induced mutant population in KitaakeX [8],  
60 required the use of Nipponbare (*ssp. japonica*) as the reference. Additionally, CRISPR/Cas9 guide RNAs  
61 cannot be accurately designed for Kitaake without a complete sequence. To address these issues, we  
62 assembled a high-quality genome sequence of KitaakeX, compared its genome to the genomes of rice  
63 varieties Nipponbare and Zhenshan97 (*ssp. indica*), and identified genomic variations.

## 64 **Results**

65           Kitaake has long been recognized as a rapid life-cycle variety [17], but it has yet to be systematically  
66 compared to other rice varieties. We compared the flowering time of KitaakeX with other sequenced rice  
67 varieties under long-day conditions (14 h light/10 h dark). Consistent with other studies, we found that  
68 KitaakeX flowers much earlier than other varieties (Fig. 1a, 1b), heading at 54 days after germination. Other  
69 rice varieties Nipponbare, 93-11 (*ssp. indica*), IR64 (*ssp. indica*), Zhenshan 97, Minghui 63 (*ssp. indica*),  
70 and Kasalath (aus rice cultivar) start heading at 134, 99, 107, 79, 125, and 84 days after germination,  
71 respectively (Fig. 1b).

72           We assessed how KitaakeX is related to other rice varieties using a phylogenetic approach based  
73 on the rice population structure and diversity published for 3,010 varieties [2]. The 3010 sequenced  
74 accessions were classified into nine subpopulations, most of which could be connected to geographical  
75 origins. The phylogenetic tree reveals that KitaakeX and Nipponbare are within the same subpopulation  
76 closely related (Fig 1c).

77 To obtain a high-quality, *de novo* genome assembly, we sequenced the KitaakeX genome using a  
78 strategy that combines short-read and long-read sequencing. Sequencing reads were collected using  
79 Illumina, 10x Genomics, PACBIO, and Sanger platforms at the Joint Genome Institute (JGI) and the  
80 HudsonAlpha Institute. The current release is version 3.0, which is a combination of a MECAT (Mapping,  
81 Error Correction and *de novo* Assembly Tools) PACBIO based assembly and an Illumina sequenced 10x  
82 genomics SuperNova assembly. The assembled sequence contains 377.6 Mb, consisting of 33 scaffolds  
83 (476 contigs) with a contig N50 of 1.4 Mb, covering a total of 99.67% of assembled bases in chromosomes  
84 (Table 1).

85 We assessed the quality of the KitaakeX assembly for sequence completeness and accuracy.  
86 Completeness of the assembly was assessed by aligning the 34,651 annotated genes from the v7.0  
87 Nipponbare to the KitaakeX assembly using BLAT [18]. The alignments indicate that 98.94% (34,285 of  
88 genes) genes completely aligned to the KitaakeX assembly, 0.75% (259 genes) partially aligned, and 0.31%  
89 (107 genes) were not detected. A bacterial artificial chromosome (BAC) library was constructed and a set  
90 of 346 BAC clones (9.2x clone coverage) was sequenced using PACBIO sequencing. A range of variants  
91 was detected by comparing the BAC clones to the assembly. Alignments were of high quality (<0.1% of  
92 error) in 271 clones (Additional file 1: Figure S13). Sixty BACs indicate a higher error rate (0.45% of error)  
93 due mainly to their placement in repetitive regions (Additional file 1: figure S14). Fifteen BAC clones indicate  
94 a rearrangement (10 clones) or a putative overlap on adjacent contigs (5 clones) (Additional file 1: figure  
95 S15). The overall error rate in the BAC clones is 0.09%, indicating the high quality of this assembly (for  
96 detailed information, see Additional file 1).

97 We predicted 35,594 protein-coding genes in the KitaakeX genome (Table 1), representing 31.5%  
98 genic space of the assembled genome size (Table 1). There is some transcriptome support for 89.5%  
99 (31,854/35,594) of the KitaakeX genes, and 81.6% (29,039/35,594) genes are fully supported by the  
100 transcriptome (Additional file 2 Table: S11). The predicted protein-coding genes are distributed unevenly  
101 across each chromosome; gene density tends to be higher toward chromosome ends (Fig. 1i). The average  
102 GC content of the genome is 43.7% (Fig. 1h, Table 1).

103 To assess the quality of the annotation of Kitaake genes, we compared the KitaakeX annotation to  
104 those of other completed rice genomes using the BUSCO v2 method, which is based on a set of 1,440

105 conserved plant genes. The results confirm 99.0% completeness of the KitaakeX genome annotation  
106 (Table1, Additional file 2: Table S7). To further evaluate the quality of the annotation, we studied the extent  
107 of conservation of functional genes in KitaakeX. We selected 291 genes (Additional file 3) from three  
108 pathways associated with stress resistance, flowering time and response to light [19], and then searched  
109 for orthologous genes in the KitaakeX genome. We found that 275 of 291 (94.5%) of the selected KitaakeX  
110 genes show greater than 90% identity with the corresponding Nipponbare genes at the protein level.  
111 Twenty-three out of the 291 show 100% identity on the genome level but not on the protein level. Of these  
112 23 genes, the KitaakeX gene model for 16 genes has better transcriptomic evidence than the Nipponbare  
113 gene model. One of the 291 KitaakeX genes is slightly shorter than its Nipponbare ortholog due to an  
114 alternative transcript (Additional file 3). These results indicate the high quality of the annotation, and  
115 conservation between the KitaakeX and Nipponbare *japonica* rice varieties.

116 Using SynMap, we identified 2,469 pairs of colinear genes (88 blocks) in the KitaakeX genome  
117 (Fig. 1j). These results correlate with already published findings [20]. We used RepeatMaker and Blaster  
118 to identify transposable elements (TEs) in the KitaakeX genome, and identified 122.2 Mb of sequence  
119 corresponding to TEs (32.0% of the genome). DNA transposons account for ~33 Mb; retrotransposons  
120 account for ~90 Mb. The TEs belong mostly to the Gypsy and Copia retroelement families, and account for  
121 23% of the genome (Additional file 2: Table S8), as is true in the Nipponbare and Zhenshan97 genomes  
122 [21].

123 Table 1 Summary of the KitaakeX genome assembly and annotation

|                        |                       |          |
|------------------------|-----------------------|----------|
|                        | Estimated genome size | 409.5 Mb |
|                        | Assembled contigs     | 377.6 Mb |
|                        | Contig N50            | 1.4 Mb   |
| <b>Genome assembly</b> | Longest contig        | 8.6 Mb   |
|                        | Assembled scaffolds   | 381.6 Mb |
|                        | Scaffold N50          | 30.3 Mb  |
|                        | Longest scaffold      | 44.3 Mb  |
|                        | GC content            | 43.7%    |

---

|                              |                                |          |
|------------------------------|--------------------------------|----------|
|                              | Retrotransposons               | 89.6 Mb  |
| <b>Transposable elements</b> | DNA transposons                | 32.6 Mb  |
|                              | Total                          | 122.2 Mb |
|                              | <hr/>                          |          |
| <b>Genome annotation</b>     | Protein-coding genes           | 35,594   |
|                              | Complete BUSCOs                | 99.0%    |
|                              | Average transcript length      | 1,874 bp |
|                              | Average coding sequence length | 1,222 bp |
|                              | Functionally annotated         | 33,226   |

---

124 We compared the genome of KitaakeX to the Nipponbare and Zhenshan97 genomes to detect  
125 genomic variations, including single nucleotide polymorphisms (SNPs), insertions and deletions under 30  
126 bp (InDels), presence/absence variations (PAVs), and inversions using MUMmer (Kurtz, Phillippy et al.  
127 2004). We found 331,335 variations between KitaakeX and Nipponbare (Additional file 4), and nearly 10  
128 times as many (2,785,991) variations between KitaakeX and Zhenshan97 (Additional file 5). There are  
129 253,295 SNPs and 75,183 InDels between KitaakeX and Nipponbare, and 2,328,319 SNPs and 442,962  
130 InDels between KitaakeX and Zhenshan97 (Additional files 6 and Additional file 2: Table S3). With respect  
131 to SNPs in both intersubspecies (*japonica* vs. *indica*) as well as intrasubspecies (*japonica* vs. *japonica*)  
132 comparisons, transitions (Tss) (G →A and C →T) are about twice as abundant as transversions (Tvs) (G -  
133 →C and C →G) (Additional file 2: Table S10). Genomic variations between KitaakeX and Nipponbare are  
134 highly concentrated in some genomic regions (Fig. 1e), but variations between KitaakeX and Zhenshan97  
135 are spread evenly through the genome (Fig. 1f). Intersubspecies genomic variations, then, are much more  
136 extensive than intrasubspecies variations. We also detected multiple genomic inversions using comparative  
137 genomics (Additional files 4 and 5).

138 For variations occurring in the genic regions, we found that single-base and 3 bp (without frame  
139 shift) InDels are much more abundant than others (Additional file 7: Figure S16a), suggesting that these  
140 genetic variations have been functionally selected. We carried out detailed analysis of gene structure  
141 alterations that exist as a consequence of SNPs and InDels between KitaakeX and Nipponbare and Kitaake  
142 and Zhenshan97. Between KitaakeX and Nipponbare, we identified 2,092 frameshifts, 78 changes affecting

143 splice-site acceptors, 71 changes affecting splice-site donors, 19 lost start codons, 161 gained stop codons,  
144 and 15 lost stop codons. In the comparison of KitaakeX to Zhenshan97, 6,809 unique genes in KitaakeX  
145 are affected by 8,640 frameshifts (Additional file 7: Figure S16b), 531 changes affecting splice-site  
146 acceptors, 530 changes affecting splice-site donors, 185 lost start codons, 902 gained stop codons and  
147 269 lost stop codons (Additional file 7: Figure S16b).

148         Based on PAV analysis, we identified 456 loci that are specific to KitaakeX (Additional file 4)  
149 compared with Nipponbare. Pfam analysis of KitaakeX-specific regions revealed 275 proteins. Out of these  
150 275 genes, 148 genes are from 19 different gene families with more than 2 genes in those regions. These  
151 gene families include protein kinases, leucine-rich repeat proteins, NB-ARC domain-containing proteins, F-  
152 box domain containing proteins, protein tyrosine kinases, Myb/SANT-like DNA binding domain proteins,  
153 transferase family proteins, xylanase inhibitor C-terminal protein, and plant proteins of unknown function  
154 (Additional file 7: Figure S16c). We identified 4589 loci specific to KitaakeX compared with Zhenshan97  
155 (Additional file 5).

156         We also compared our *de novo* assembly of KitaakeX genome with Kitaake resequencing reads  
157 using an established pipeline [22]. This analysis revealed 219 small variations (200 SNPs and 19 INDELS)  
158 between the two genomes (Additional file 8). These variations affect 9 genes in KitaakeX besides the Ubi-  
159 *Xa21* transgene, including the selectable marker encoding a hygromycin B phosphotransferase on  
160 chromosome 6 (Additional file 8, Additional file 9: Figure S17).

## 161 **Discussion**

162 In 2005 the Nipponbare genome was sequenced and annotated to a high-quality level (International Rice  
163 Genome Sequencing and Sasaki 2005). Since that time, it has served as a reference genome for many  
164 rice genomic studies [23]. Despite its use, the long life cycle of Nipponbare makes it time-consuming for  
165 most genetic analyses. Here we report the *de novo* assembly and annotation of KitaakeX, an early-flowering  
166 rice variety with a rapid life cycle that is easy to propagate under greenhouse conditions. We predict that  
167 KitaakeX contains 35,594 protein-coding genes, comparable to the published genomes (39,045 for  
168 Nipponbare and 34,610 for Zhenshan97) (Additional file 4 and Additional file 5). The availability of a high-

169 quality genome and annotation for KitaakeX will be useful for associating traits of interest with genetic  
170 variations, and for identifying the genes controlling those traits.

171 We identified 219 SNPs and InDels between the KitaakeX and Kitaake genomes. These variations  
172 may have resulted from somatic mutations that arose during tissue culture and regeneration, or they may  
173 be spontaneous mutations [24]. For rice, 150 mutations are typically induced during tissue culture and 41  
174 mutations occur spontaneously per three generations [24]. These numbers are consistent with the  
175 independent propagation of KitaakeX and Kitaake over approximately 10 generations in the greenhouse.

176 The KitaakeX genome will be useful for variety of studies. For example, we recently published the  
177 whole genome sequences of 1,504 FN-mutated KitaakeX rice lines [22]. Mutations were identified by  
178 aligning reads of the KitaakeX mutants to the Nipponbare reference genome [8]. On average, 97% of the  
179 Nipponbare genome is covered by the KitaakeX reads. However, in some regions, the KitaakeX genome  
180 diverges from Nipponbare to such an extent that no variants can be confidently identified. These appear  
181 either as gaps in coverage or as regions containing a concentration of natural variations between KitaakeX  
182 and Nipponbare. We can now use the KitaakeX sequence as the direct reference genome and detect  
183 mutations in highly variable regions. This approach will simplify analysis and increase confidence in the  
184 identification of FN-induced mutations.

## 185 **Conclusions:**

186 The *de novo* assembly of the KitaakeX genome serves as a useful reference genome for the model rice  
187 variety Kitaake and will facilitate investigations into the genetic basis of diverse traits critical for rice biology  
188 and genetic improvement.

## 189 **Methods**

### 190 **Plant Growth conditions**

191 Rice seeds were germinated on 1/2x MS (Murashige and Skoog) medium. Seedlings were transferred to  
192 a greenhouse and planted 3 plants/pot during the springtime (Mar. 2, 2017) in Davis, California. The light  
193 intensity was set at approximately 250  $\mu\text{mol m}^{-2} \text{s}^{-1}$ . The day/night period was set to 14/10 h, and the  
194 temperature was set between 28 and 30 °C [25]. Rice plants were grown in sandy soil supplemented with



195 nutrient water. The day when the first panicle of the plant emerged was recorded as the heading date for  
196 that plant. Kasalath seeds were received later, and the heading date was recorded in the same way. The  
197 experiment was repeated in winter.

### 198 **Construction of a phylogenetic tree**

199 We obtained 178,496 evenly distributed SNPs by dividing the genome into 3.8 kb bins and selecting one  
200 or two SNPs per bin randomly according to the SNP density of the bin. Genotypes of all the rice  
201 accessions, including 3,010 accessions of the 3K Rice Genomes Project and additional noted  
202 accessions, were fetched from the SNP database RiceVarMap v2.0 [26] and related genomic data [27]  
203 and used to calculate an IBS distance matrix which was then applied to construct a phylogenetic tree by  
204 the unweighted neighbor-joining method, implemented in the R package APE [28]. Branches of the  
205 phylogenetic tree were colored according to the classification of the 3,010 rice accessions [2].

### 206 **Genome Sequencing and Assembly**

207 High molecular weight DNA from young leaves of KitaakeX was isolated and used in sequencing.  
208 See (Additional file 1) for further details.

### 209 **Annotation of Protein-Coding Genes**

210 To obtain high-quality annotations, we performed high throughput RNA-seq analysis of libraries from  
211 diverse rice tissues (leaf, stem, panicle, and root). Approximately 683 million pairs of 2x151 paired-end  
212 RNA-seq reads were obtained and assembled using a comprehensive pipeline PERTRAN (Shu,  
213 unpublished). Gene models were predicted by combining *ab initio* gene prediction, protein-based  
214 homology searches, experimentally cloned cDNAs/expressed-sequence tags (ESTs) and assembled  
215 transcripts from the RNA-seq data. Gene functions were further annotated according to the best-matched  
216 proteins from the SwissProt and TrEMBL databases [29] using BLASTP (E value < 10<sup>-5</sup>) (Additional file  
217 11). Genes without hits in these databases were annotated as “hypothetical proteins”. Gene Ontology  
218 (GO) [30] term assignments and protein domains and motifs were extracted with InterPro [31]. Pathway

219 analysis was derived from the best-match eukaryotic protein in the Kyoto encyclopedia of genes and  
220 genomes (KEGG) database [32] using BLASTP (E value<1.0e<sup>-10</sup>).

## 221 **Genome Synteny**

222 We used SynMap (CoGe, [www.genomeevolution.org](http://www.genomeevolution.org)) to identify collinearity blocks using homologous CDS  
223 pairs with parameters according to Daccord et al [33] and visualized collinearity blocks using Circos [34].

## 224 **Repeat Annotation**

225 The fraction of transposable elements and repeated sequences in the assembly was obtained merging  
226 the output of RepeatMasker (<http://www.repeatmasker.org/>, v. 3.3.0) and Blaster (a component of the  
227 REPET package) [35]. The two programs were run using nucleotide libraries (PReDa and  
228 RepeatExplorer) from RiTE-db [36] and an in-house curated collection of transposable element (TE)  
229 proteins, respectively. Reconciliation of masked repeats was carried out using custom Perl scripts and  
230 formatted in gff3 files. Infernal [37] was adopted to identify non-coding RNAs (ncRNAs) using the Rfam  
231 library Rfam.cm.12.2 [38]. Results with scores lower than the family-specific gathering threshold were  
232 removed; when loci on both strands were predicted, only the hit with the highest score was kept. Transfer  
233 RNAs were also predicted using tRNAscan-SE [39] at default parameters. Repeat density was calculated  
234 from the file that contains the reconciled annotation (Additional file 10).

## 235 **Analysis of Genomic Variations**

236 Analysis of SNPs and InDels: We used MUMmer (version 3.23) [40] to align the Nipponbare and  
237 Zhenshan97 genomes to the KitaakeX genome using parameters -maxmatch -c 90 -l 40. To filter the  
238 alignment results, we used the delta -filter -1 parameter with the one-to-one alignment block option. To  
239 identify SNPs and InDels we used show-snp option with parameter (-Clr TH). We used snpEff [41] to  
240 annotate the effects of SNPs and InDels. Distribution of SNPs and InDels along the KitaakeX genome  
241 was visualized using Circos [34].

242 Analysis of PAVs and inversions: We used the show-coords option of MUMmer (version 3.23)  
243 with parameters -TrHcl to identify gap regions and PAVs above >86 bp in size from the alignment blocks.

244 We used the inverted alignment blocks with  $\geq 98\%$  identity from the show-coords output file to identify  
245 inversions.

246 To identify genomic variations between Kitaake and KitaakeX we sequenced and compared the  
247 sequences using the established pipeline [22].

### 248 **BAC library construction**

249 Arrayed BAC libraries were constructed using established protocols [42]. Please see Additional  
250 file 1 for further details.

251

252

### 253 **Additional files:**

254 Additional file 1: Supplemental method: Tables S1-S6, Figures S1-S15

255 Additional file 2: Comparison of the KitaakeX genome with other rice genomes and KitaakeX annotation;  
256 Tables S7-S11

257 Additional file 3: Genes used in annotation quality control

258 Additional file 4: Comparative genomics between KitaakeX and Nipponbare

259 Additional file 5: Comparative genomics between KitaakeX and Zhenshan97

260 Additional file 6: SNPs between KitaakeX and Zhenshan97

261 Additional file 7: Figure S16. Genomic variations showing gene variations between KitaakeX and  
262 Nipponbare and Zhenshan97

263 Additional file 8. Genomic variations between KitaakeX and Kitaake

264 Additional file 9: Figure S17. Position of the XA21 locus in the KitaakeX genome

265 Additional file 10: Repeat annotation

266 Additional file 11: Gene functional annotation

### 267 **ACKNOWLEDGMENTS**

268 We thank Rick A. Rios, Maria E. Hernandez, and Natasha Brown for assistance in genomic DNA isolation  
269 and submission and seed organization. We thank Dr. Thomas W. Okita at Washington State University

270 for providing the Kitaake seeds to PCR in 1995. These seeds were provided to Dr. Okita by Dr. Hiroyuki  
271 Ito, Akita National College of Technology, Japan. We thank Dr. Jan E. Leah at Colorado State University  
272 for seeds of Zhenshan 97, Minghui 63, IR64 and 93-11, and the USDA Dale Bumpers National Rice  
273 Research Center, Stuttgart, Arkansas for seeds of Kasalath.

#### 274 **Funding:**

275 This work was supported by NIH (GM59962) NIH (GM122968) and NSF (IOS-1237975) grants to PCR. It  
276 was also supported in part by the U. S. Department of Energy, Office of Science, Office of Biological and  
277 Environmental Research, through contract DE-AC02-05CH11231 between Lawrence Berkeley National  
278 Laboratory and the U. S. Department of Energy. The work conducted by the US Department of Energy  
279 Joint Genome Institute (JGI) was supported by the Office of Science of the US Department of Energy  
280 under Contract no. DE-AC02-05CH11231.

#### 281 **Availability of data and material:**

282 The genome sequencing reads and assembly have been deposited under GenBank under accession  
283 number PRJNA234782 and PRJNA448171 respectively. The assembly and annotation of the Kitaake  
284 genome are available at Phytozome (<https://phytozome.jgi.doe.gov/pz/portal.html>). The RNA-Seq reads  
285 of KitaakeX leaf, panicle, stem and root have been deposited under GenBank accession numbers  
286 SRP182736, SRP182738, SRP182741, and SRP182737 respectively. Genome sequencing reads for  
287 Kitaake have been deposited under GenBank under accession number SRP193308.

#### 288 **AUTHOR CONTRIBUTIONS**

289 RJ, G.L, M.C.R. and P.C.R conceived and initiated the study. R.J. and G.L carried out sequencing,  
290 assembly and annotation in collaboration with J.J., S.S., D.A.K., J.T., D.D., D.B., J.G., D.C., K.W.B.,  
291 R.A.W., N.T.P, and J.S. R.J. and G.L conducted comparative genomics. F.X and W.X contributed to  
292 phylogenetic tree. R.J., P.C.R, M.S C, G.L and C.R.N. wrote the manuscript. All authors read and  
293 approved the final manuscript.

---

294 **Ethics approval and consent to participate**

295 Not applicable

296 **Consent to Publication**

297 Not applicable

298 **Competing interests:**

299 The authors declare no conflict of interest.

300 **Fig. 1 The early flowering rice variety KitaakeX.**

301 **a** KitaakeX and selected sequenced rice varieties under long-day conditions. Scale bar = 10 cm; **b**  
302 Flowering time of KitaakeX and selected rice varieties under long-day conditions. DAG, days after  
303 germination. Asterisks indicate significant differences using the unpaired Student's *t*-test ( $P < 0.0001$ ); **c**  
304 KitaakeX in the unweighted neighbor-joining tree comprising 3,010 accessions of the 3k rice genomes  
305 project and indicated varieties. It includes four XI clusters (XI-1A from East Asia, XI-1B of modern varieties  
306 of diverse origins, XI-2 from South Asia and XI-3 from Southeast Asia); three GJ clusters [primarily East  
307 Asian temperate (named GJ-tmp), Southeast Asian subtropical (named GJ-sbtrp) and Southeast Asian  
308 Tropical (named GJ-trp)]; and two groups for the mostly South Asian cA (circum-Aus) and cB (circum-  
309 Basmati) accessions, 1 group Admix (accessions that fall between major groups were classified as  
310 admixed) Branch length indicates the genetic distance between two haplotypes; **d** Circles indicate the 12  
311 KitaakeX chromosomes represented on a Mb scale; **e,f** SNPs and InDels between KitaakeX and  
312 Nipponbare (**e**) and Kitaake and Zhenshan97 (**f**); **g** Repeat density; **h** GC content; **i** Gene density; **j**  
313 Homologous genes in the KitaakeX genome. Window size used in the circles is 500 kb.

314

315

316

317

318

References for Section A

- 319 1. Gross BL, Zhao Z: **Archaeological and genetic insights into the origins of**  
320 **domesticated rice.** 2014, **111**:6190-6197.
- 321 2. Wang W, Mauleon R, Hu Z, Chebotarov D, Tai S, Wu Z, Li M, Zheng T, Fuentes RR,  
322 Zhang FJN: **Genomic variation in 3,010 diverse accessions of Asian cultivated rice.**  
323 2018, **557**:43.
- 324 3. Ichitani K, Okumoto Y, Tanisaka T: **Photoperiod sensitivity gene of se-1 locus found in**  
325 **photoperiod insensitive rice cultivars of the northern limit region of rice cultivation.**  
326 *Breeding science* 1997, **47**:8.
- 327 4. Kim SL, Choi M, Jung KH, An G: **Analysis of the early-flowering mechanisms and**  
328 **generation of T-DNA tagging lines in Kitaake, a model rice cultivar.** *J Exp Bot* 2013,  
329 **64**:4169-4182.
- 330 5. Kunihiro Y, Ebe Y, Wada S, Shinbashi N, Honma A, Sasaki T, Sasaki K, Numao Y,  
331 Morimura K, Tan No H: **The new rice variety Kita-ake.** *Bulletin of Hokkaido*  
332 *prefectural agricultural experiment stations* 1989, **59**:4.
- 333 6. Wang L, Zheng J, Luo Y, Xu T, Zhang Q, Zhang L, Xu M, Wan J, Wang MB, Zhang  
334 CJPbj: **Construction of a genomewide RNA i mutant library in rice.** 2013, **11**:997-  
335 1005.
- 336 7. Gao H, Zheng XM, Fei G, Chen J, Jin M, Ren Y, Wu W, Zhou K, Sheng P, Zhou F, et al:  
337 **Ehd4 encodes a novel and Oryza-genus-specific regulator of photoperiodic**  
338 **flowering in rice.** *PLoS Genet* 2013, **9**:e1003281.
- 339 8. Li G, Jain R, Chern M, Pham NT, Martin JA, Wei T, Schackwitz WS, Lipzen AM,  
340 Duong PQ, Jones KC, et al: **The Sequences of 1504 Mutants in the Model Rice**  
341 **Variety Kitaake Facilitate Rapid Functional Genomic Studies.** *Plant Cell* 2017,  
342 **29**:1218-1231.
- 343 9. Song WY, Wang GL, Chen LL, Kim HS, Pi LY, Holsten T, Gardner J, Wang B, Zhai  
344 WX, Zhu LH, et al: **A receptor kinase-like protein encoded by the rice disease**  
345 **resistance gene, Xa21.** *Science* 1995, **270**:1804-1806.
- 346 10. Gao H, Jin M, Zheng X-M, Chen J, Yuan D, Xin Y, Wang M, Huang D, Zhang Z, Zhou  
347 KJPotNAoS: **Days to heading 7, a major quantitative locus determining photoperiod**  
348 **sensitivity and regional adaptation in rice.** 2014, **111**:16337-16342.
- 349 11. Ronald PC, Beutler B: **Plant and animal sensors of conserved microbial signatures.**  
350 *Science* 2010, **330**:1061-1064.
- 351 12. Liu Y, Wu H, Chen H, Liu Y, He J, Kang H, Sun Z, Pan G, Wang Q, Hu JJNb: **A gene**  
352 **cluster encoding lectin receptor kinases confers broad-spectrum and durable insect**  
353 **resistance in rice.** 2015, **33**:301.
- 354 13. Zhou X, Liao H, Chern M, Yin J, Chen Y, Wang J, Zhu X, Chen Z, Yuan C, Zhao  
355 WJPotNAoS: **Loss of function of a rice TPR-domain RNA-binding protein confers**  
356 **broad-spectrum disease resistance.** 2018:201705927.
- 357 14. Rodrigues JA, Ruan R, Nishimura T, Sharma MK, Sharma R, Ronald PC, Fischer RL,  
358 Zilberman D: **Imprinted expression of genes and small RNA is associated with**  
359 **localized hypomethylation of the maternal genome in rice endosperm.** *Proc Natl*  
360 *Acad Sci U S A* 2013, **110**:7934-7939.
- 361 15. Li T, Liu B, Spalding MH, Weeks DP, Yang B: **High-efficiency TALEN-based gene**  
362 **editing produces disease-resistant rice.** *Nat Biotechnol* 2012, **30**:390-392.

- 363 16. Xie K, Minkenberg B, Yang Y: **Boosting CRISPR/Cas9 multiplex editing capability**  
364 **with the endogenous tRNA-processing system.** *Proc Natl Acad Sci U S A* 2015,  
365 **112:3570-3575.**
- 366 17. Jung K-H, An G, Ronald PC: **Towards a better bowl of rice: assigning function to tens**  
367 **of thousands of rice genes.** *Nature Reviews Genetics* 2008, **9:91.**
- 368 18. Kent WJ: **BLAT--the BLAST-like alignment tool.** *Genome Res* 2002, **12:656-664.**
- 369 19. Wang M, Yu Y, Haberer G, Marri PR, Fan C, Goicoechea JL, Zuccolo A, Song X,  
370 Kudrna D, Ammiraju JS, et al: **The genome sequence of African rice (*Oryza***  
371 **glaberrima) and evidence for independent domestication.** *Nat Genet* 2014, **46:982-**  
372 **988.**
- 373 20. Guyot R, Keller BJG: **Ancestral genome duplication in rice.** 2004, **47:610-614.**
- 374 21. Zhang J, Chen L-L, Xing F, Kudrna DA, Yao W, Copetti D, Mu T, Li W, Song J-M, Xie  
375 W, et al: **Extensive sequence divergence between the reference genomes of two elite**  
376 **<em>indica</em> rice varieties Zhenshan 97 and Minghui 63.** 2016, **113:E5163-**  
377 **E5171.**
- 378 22. Li G, Jain R, Chern M, Pham NT, Martin JA, Wei T, Schackwitz WS, Lipzen AM,  
379 Duong PQ, Jones KCJTPC: **The sequences of 1,504 mutants in the model rice variety**  
380 **Kitaake facilitate rapid functional genomic studies.** 2017:tpc. 00154.02017.
- 381 23. Matsumoto T, Wu J, Itoh T, Numa H, Antonio B, Sasaki T: **The Nipponbare genome**  
382 **and the next-generation of rice genomics research in Japan.** *Rice (New York, NY)*  
383 2016, **9:33-33.**
- 384 24. Tang X, Liu G, Zhou J, Ren Q, You Q, Tian L, Xin X, Zhong Z, Liu B, Zheng XJGb: **A**  
385 **large-scale whole-genome sequencing analysis reveals highly specific genome editing**  
386 **by both Cas9 and Cpf1 (Cas12a) nucleases in rice.** 2018, **19:84.**
- 387 25. Schwessinger B, Bahar O, Thomas N, Holton N, Nekrasov V, Ruan D, Canlas PE, Daudi  
388 A, Petzold CJ, Singan VR, et al: **Transgenic expression of the dicotyledonous pattern**  
389 **recognition receptor EFR in rice leads to ligand-dependent activation of defense**  
390 **responses.** *PLoS Pathog* 2015, **11:e1004809.**
- 391 26. Zhao H, Yao W, Ouyang Y, Yang W, Wang G, Lian X, Xing Y, Chen L, Xie W:  
392 **RiceVarMap: a comprehensive database of rice genomic variations.** *Nucleic Acids*  
393 *Res* 2015, **43:D1018-1022.**
- 394 27. Li G, Chern M, Jain R, Martin JA, Schackwitz WS, Jiang L, Vega-Sanchez ME, Lipzen  
395 AM, Barry KW, Schmutz J, Ronald PC: **Genome-Wide Sequencing of 41 Rice (*Oryza***  
396 **sativa L.) Mutated Lines Reveals Diverse Mutations Induced by Fast-Neutron**  
397 **Irradiation.** *Mol Plant* 2016, **9:1078-1081.**
- 398 28. Paradis E, Claude J, Strimmer K: **APE: Analyses of Phylogenetics and Evolution in R**  
399 **language.** *Bioinformatics* 2004, **20:289-290.**
- 400 29. Bairoch A, Apweiler R: **The SWISS-PROT protein sequence database and its**  
401 **supplement TrEMBL in 2000.** *Nucleic Acids Res* 2000, **28:45-48.**
- 402 30. Dutkowski J, Kramer M, Surma MA, Balakrishnan R, Cherry JM, Krogan NJ, Ideker T:  
403 **A gene ontology inferred from molecular networks.** *Nat Biotechnol* 2013, **31:38-45.**
- 404 31. Finn RD, Attwood TK, Babbitt PC, Bateman A, Bork P, Bridge AJ, Chang HY,  
405 Dosztanyi Z, El-Gebali S, Fraser M, et al: **InterPro in 2017-beyond protein family and**  
406 **domain annotations.** *Nucleic Acids Res* 2017, **45:D190-D199.**
- 407 32. Kanehisa M, Furumichi M, Tanabe M, Sato Y, Morishima K: **KEGG: new perspectives**  
408 **on genomes, pathways, diseases and drugs.** *Nucleic Acids Res* 2017, **45:D353-D361.**



- 409 33. Daccord N, Celton JM, Linsmith G, Becker C, Choisne N, Schijlen E, van de Geest H,  
410 Bianco L, Micheletti D, Velasco R, et al: **High-quality de novo assembly of the apple**  
411 **genome and methylome dynamics of early fruit development.** *Nat Genet* 2017,  
412 **49:1099-1106.**
- 413 34. Krzywinski M, Schein J, Birol I, Connors J, Gascoyne R, Horsman D, Jones SJ, Marra  
414 MA: **Circos: an information aesthetic for comparative genomics.** *Genome Res* 2009,  
415 **19:1639-1645.**
- 416 35. Flutre T, Duprat E, Feuillet C, Quesneville H: **Considering transposable element**  
417 **diversification in de novo annotation approaches.** *PLoS One* 2011, **6:e16526.**
- 418 36. Copetti D, Zhang J, El Baidouri M, Gao D, Wang J, Barghini E, Cossu RM, Angelova A,  
419 Maldonado LC, Roffler S, et al: **RiTE database: a resource database for genus-wide**  
420 **rice genomics and evolutionary biology.** *BMC Genomics* 2015, **16:538.**
- 421 37. Nawrocki EP, Eddy SR: **Infernal 1.1: 100-fold faster RNA homology searches.**  
422 *Bioinformatics* 2013, **29:2933-2935.**
- 423 38. Nawrocki EP, Burge SW, Bateman A, Daub J, Eberhardt RY, Eddy SR, Floden EW,  
424 Gardner PP, Jones TA, Tate J, Finn RD: **Rfam 12.0: updates to the RNA families**  
425 **database.** *Nucleic Acids Res* 2015, **43:D130-137.**
- 426 39. Schattner P, Brooks AN, Lowe TM: **The tRNAscan-SE, snoscan and snoGPS web**  
427 **servers for the detection of tRNAs and snoRNAs.** *Nucleic Acids Res* 2005, **33:W686-**  
428 **689.**
- 429 40. Kurtz S, Phillippy A, Delcher AL, Smoot M, Shumway M, Antonescu C, Salzberg  
430 SLJGb: **Versatile and open software for comparing large genomes.** 2004, **5:R12.**
- 431 41. Cingolani P, Platts A, Wang le L, Coon M, Nguyen T, Wang L, Land SJ, Lu X, Ruden  
432 DM: **A program for annotating and predicting the effects of single nucleotide**  
433 **polymorphisms, SnpEff: SNPs in the genome of Drosophila melanogaster strain**  
434 **w1118; iso-2; iso-3.** *Fly (Austin)* 2012, **6:80-92.**
- 435 42. Luo M, Wing RA: **An Improved Method for Plant BAC Library Construction.** In  
436 *Plant Functional Genomics.* Edited by Grotewold E. Totowa, NJ: Humana Press; 2003:  
437 3-19  
438



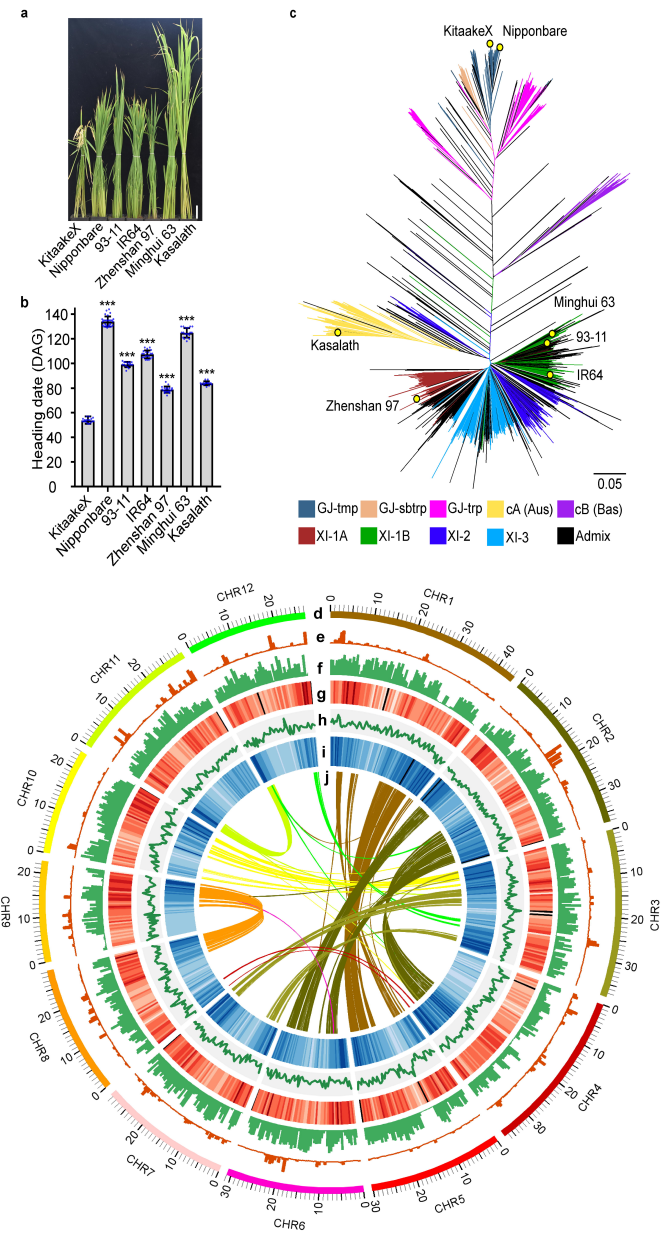

Source: https://www.biorxiv.org/content/10.1101/653089v1.full.pdf
